# Supplementary material for: Loss of acetylation at Lys16 and trimethylation at Lys20 of histone H4 is a common hallmark of human cancer
Source: Springer Nature journal article supplement (doi:10.1038/ng1531), 2005-03-13
Supplement: 41588_2005_BFng1531_MOESM1_ESM.pdf [file 41588_2005_BFng1531_MOESM1_ESM.pdf]

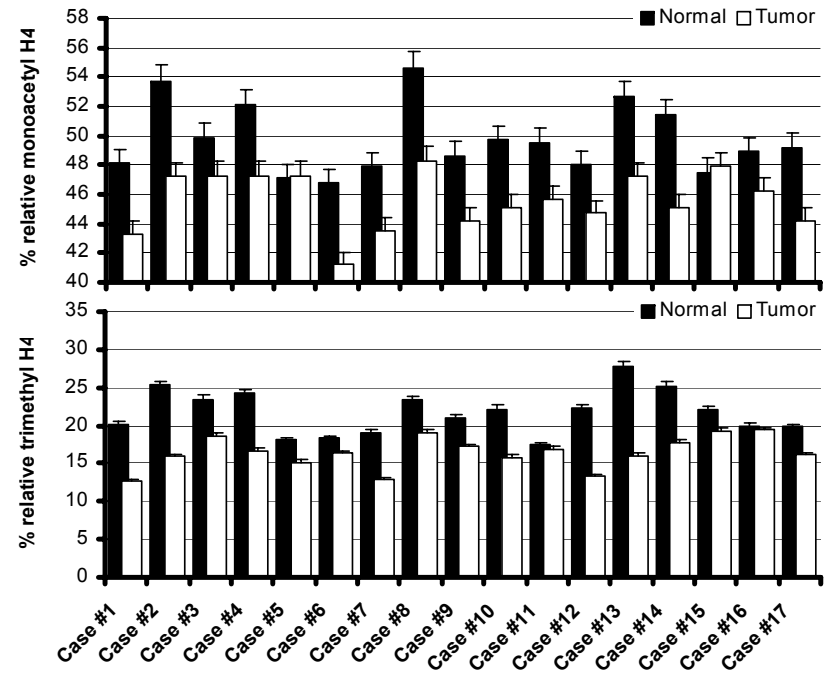

**Supplementary Figure 1** Relative levels of monoacetylated (upper panel) and trimethylated (lower panel) histone H4 in human colon primary tumors (white bars) and corresponding normal tissue from the same patient (black bars) were quantified by HPCE. Error bars refer to standard deviations obtained by performing three replicates per sample.
