# Supplementary material for: Loss of acetylation at Lys16 and trimethylation at Lys20 of histone H4 is a common hallmark of human cancer
Source: Springer Nature journal article supplement (doi:10.1038/ng1531), 2005-03-13
Supplement: 41588_2005_BFng1531_MOESM3_ESM.pdf [file 41588_2005_BFng1531_MOESM3_ESM.pdf]

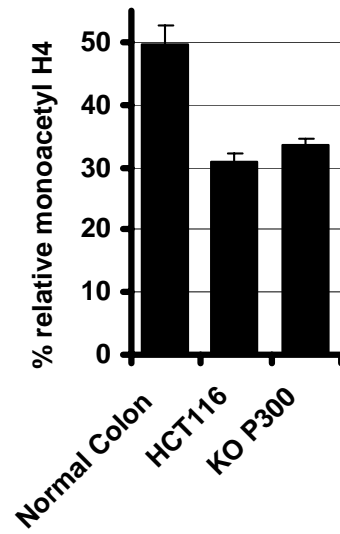

**Supplementary Figure 3** HPCE quantification of histone H4 monoacetylation in human normal colon, wild type HCT116 colon cancer cells and HCT116 cells deficient in p300 (KO p300). Error bars refer to standard deviations obtained by performing three replicates per sample.
