# Supplementary material for: Loss of acetylation at Lys16 and trimethylation at Lys20 of histone H4 is a common hallmark of human cancer
Source: Springer Nature journal article supplement (doi:10.1038/ng1531), 2005-03-13
Supplement: 41588_2005_BFng1531_MOESM5_ESM.pdf [file 41588_2005_BFng1531_MOESM5_ESM.pdf]

| Modification                                                                                                   | NL         | HL60       |
|----------------------------------------------------------------------------------------------------------------|------------|------------|
| 0Ac/0Me<br><br><b>AKRHRKV</b> | >1*        | >1         |
| 0Ac/1Me<br><br><b>AKRHRKV</b> | >1         | >1         |
| 0Ac/2Me<br><br><b>AKRHRKV</b> | 25.7 ± 2.1 | 40.4 ± 3.1 |
| 0Ac/3Me<br><br><b>AKRHRKV</b> | 6.9 ± 1.7  | 3.9 ± 0.9  |
| 1Ac/0Me<br><br><b>AKRHRKV</b> | >1         | >1         |
| 1Ac/1Me<br><br><b>AKRHRKV</b> | >1         | >1         |
| 1Ac/2Me<br><br><b>AKRHRKV</b> | 51.1 ± 3.8 | 31.9 ± 3.8 |
| 1Ac/3Me<br><br><b>AKRHRKV</b> | 11.2 ± 1.6 | 3.2 ± 0.5  |

\* Relative percentage versus total histone H4 pool

**Supplementary Figure 5** Relative abundance of non- and monoacetylated forms in their different methylated status (non-, mono-, di- and trimethylated) of histone H4 in normal lymphocytes (NL) and the human cancer cell line HL60. Results are expressed as the mean ± standard deviation of the values obtained with HPCE and LC/ESI-MS as described in materials and methods.
