# Supplementary material for: Loss of acetylation at Lys16 and trimethylation at Lys20 of histone H4 is a common hallmark of human cancer
Source: Springer Nature journal article supplement (doi:10.1038/ng1531), 2005-03-13
Supplement: 41588_2005_BFng1531_MOESM6_ESM.pdf [file 41588_2005_BFng1531_MOESM6_ESM.pdf]

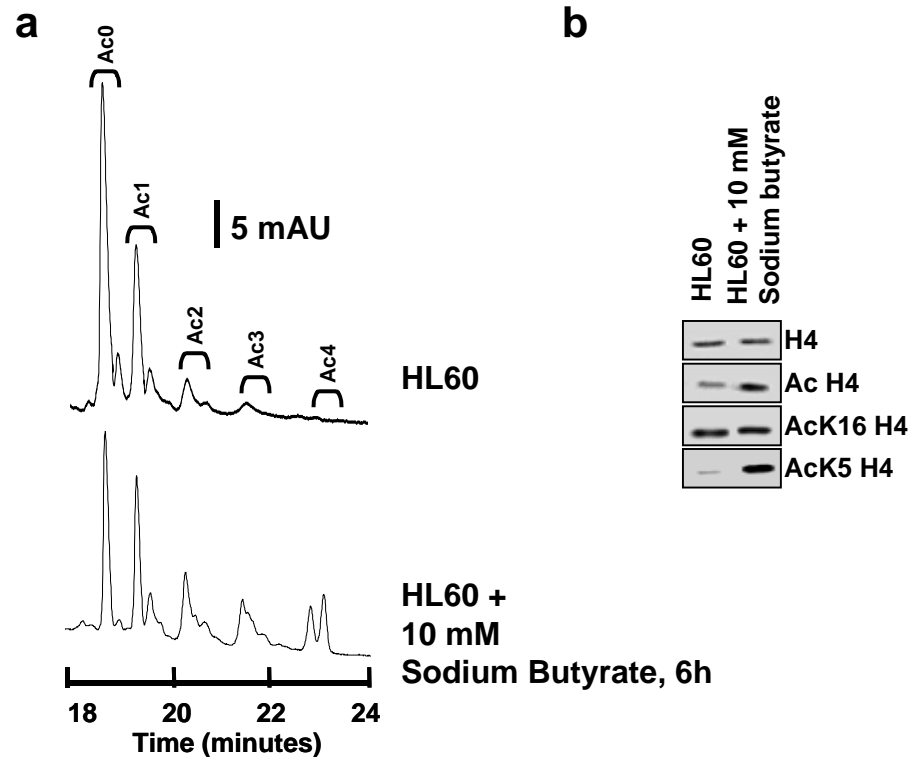

**Supplementary Figure 6** Representative HPCE electropherograms (**a**) and western blots (**b**) showing the acetylation status of histone H4 in HL60 before and after treatment with 10 mM Sodium Butyrate for 6h. Ac0, Ac1, Ac2, Ac3 and Ac4 refer to non-, mono-, di-, tri- and tetra-acetylated histone H4 species. For Western blot analysis, total histones were isolated, resolved by SDS-PAGE and immunoblotted with an antibody raised against histone H4 acetylated at all the positions (Ac H4) and the specific positions lysine 5 and 16. An anti-histone H4 antibody whose recognition is not affected by acetylation status (H4) was used as a loading control.
