# Supplementary material for: Loss of acetylation at Lys16 and trimethylation at Lys20 of histone H4 is a common hallmark of human cancer
Source: Springer Nature journal article supplement (doi:10.1038/ng1531), 2005-03-13
Supplement: 41588_2005_BFng1531_MOESM7_ESM.pdf [file 41588_2005_BFng1531_MOESM7_ESM.pdf]

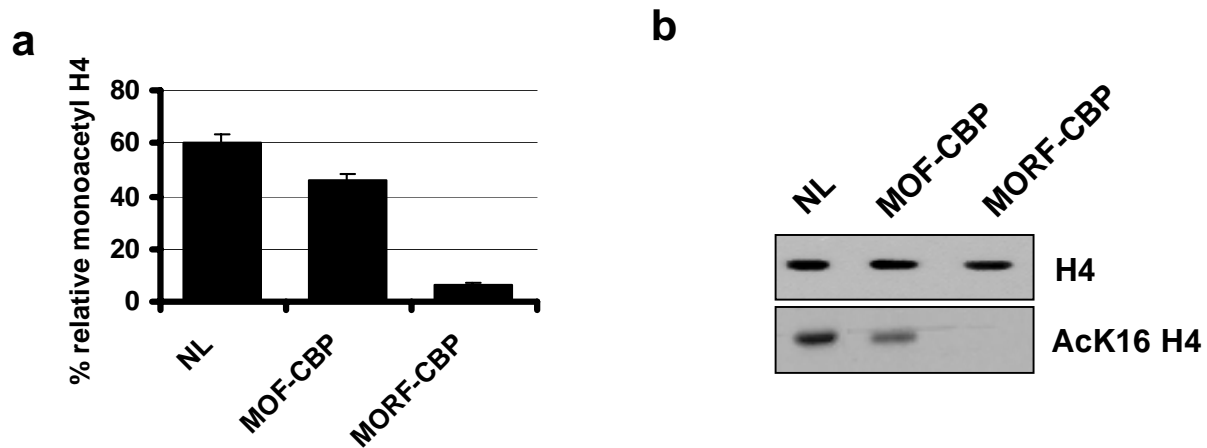

**Supplementary Figure 7 (a)** HPCE quantification of relative levels of monoacetylated histone H4 in normal lymphocytes (NL) and cells harboring the leukemic fusion proteins MOZ-CBP and MORF-CBP. **(b)** Western blot comparing specific acetylation of lysine 16 of histone H4 in the same samples. Total histone H4 is shown as control.
