# Supplementary material for: Loss of acetylation at Lys16 and trimethylation at Lys20 of histone H4 is a common hallmark of human cancer
Source: Springer Nature journal article supplement (doi:10.1038/ng1531), 2005-03-13
Supplement: 41588_2005_BFng1531_MOESM8_ESM.pdf [file 41588_2005_BFng1531_MOESM8_ESM.pdf]

### ***Bisulfite sequencing***

| <i>Gene</i>               | <i>5' primer</i>         | <i>3' primer</i>           | <i>T<sub>m</sub> (°C)</i> |
|---------------------------|--------------------------|----------------------------|---------------------------|
| <i>p21<sup>WAF1</sup></i> | attgggggaggaggggaagt     | ctcacctctctaaatacctc       | 55                        |
| <i>RIZ1</i>               | ggyggttggtggtggttatt     | aacccaaaaccrccccacc        | 65                        |
| <i>GSTP1</i>              | attgggaaagagggaaggt      | acctcraacctataaaaata       | 55                        |
| <i>MAGEA1</i>             | aggattttaaggagggtgag     | cctcacaaaacctaaatcaattc    | 60                        |
| <i>CAGE1</i>              | ttgtaagtgtgtaggtagtt     | tccactctaaaacccaataaaac    | 60                        |
| <i>LAGE1</i>              | ggttttttggggagggg        | cccctataccctaaccttcracctac | 60                        |
| <i>GAGE1</i>              | ggttagtagaagtggttttagg   | acctttatacaatttccacac      | 60                        |
| <i>PSCA</i>               | aggataattgggttttagg      | taaaaaccaacaaaacctcac      | 60                        |
| <i>S100A4</i>             | ggtgtccacctccacaagt      | gctgtccaagttgctcatca       | 63                        |
| <i>MSLN</i>               | ggttattgagattgggaggg     | aattccatccacaccacaaca      | 64                        |
| <i>Sat2</i>               | atggaaatgaaaggggttattatt | aaattattccattccattccattaa  | 62                        |
| <i>D4Z4</i>               | agttyggagtttttagtagg     | caaaaatcccaaacratcaacc     | 58                        |
| <i>NBL2</i>               | gtagttggtgtaatgtgtttat   | cactctctatatattttcttccc    | 55                        |

### ***MSP***

|              | <i>5' primer</i>                                               | <i>3' primer</i>          | <i>T<sub>m</sub> (°C)</i> |
|--------------|----------------------------------------------------------------|---------------------------|---------------------------|
| <i>MGMT</i>  | <u><i>Methylated primers</i></u><br>tttcgacgttcgtaggttttcgc    | gcactcttcgaaaacgaaacg     | 59                        |
|              | <u><i>Unmethylated primers</i></u><br>tttggtttgatgttttaggtttgt | aactccactcttccaaaacaaaaca | 59                        |
| <i>GSTP1</i> | <u><i>Methylated primers</i></u><br>ttcggggtgtagcggctcgc       | gccccataactaaatcacgacg    | 64                        |
|              | <u><i>Unmethylated primers</i></u><br>gatgtttggggtgtagtgggtgt  | ccacccaataactaaatcacaaca  | 64                        |

### ***ChiP***

| <i>Gene</i>               | <i>5' primer</i>     | <i>3' primer</i>     | <i>T<sub>m</sub> (°C)</i> |
|---------------------------|----------------------|----------------------|---------------------------|
| <i>p21<sup>WAF1</sup></i> | gcagagaggtgcatcgtt   | acatttccccacgaagtgag | 60                        |
| <i>RIZ1</i>               | tcttgaaccacgcaggat   | gactccagtcggaagagacg | 61                        |
| <i>GSTP1</i>              | ctctcccctgccctgtga   | gggaagcctttccctcttt  | 61                        |
| <i>MGMT</i>               | gtctgggggtccctgacta  | ttccgctgaggctctgt    | 61                        |
| <i>LAGE1</i>              | ggttggtgagaaccggtca  | aggatgaggaggcagagag  | 62                        |
| <i>PSCA</i>               | tgagatatggccctggtag  | agaggcctcaggtgacttt  | 62                        |
| <i>Sat2</i>               | tgaatggaatcgtcatcga  | ccattcgataattccgcttg | 62                        |
| <i>D4Z4</i>               | ctcagcgaggaagaataccg | accgggcctagacctagaag | 62                        |
| <i>NBL2</i>               | tcccacagcagttggtgta  | ttggcagaaacctctttgct | 62                        |

### ***RT-PCR***

| <i>Gene</i>               | <i>5' primer</i>      | <i>3' primer</i>        | <i>T<sub>m</sub> (°C)</i> |
|---------------------------|-----------------------|-------------------------|---------------------------|
| <i>p21<sup>WAF1</sup></i> | ggcagaccagcatgacagatt | ggattagggtctcctcttgag   | 50                        |
| <i>GSTP1</i>              | gggcagtgccctcacatagt  | ggagacctcaccctgtacca    | 60                        |
| <i>RIZ1</i>               | tgagagattctgcagaaggt  | ggattgcatggcaggtgtt     | 54                        |
| <i>MGMT</i>               | gccgctcttcaccatccc    | gctgcagaccactctgtggcagc | 65                        |
| <i>GAPDH</i>              | tcttctttgctgcgccag    | agccccagccttctcca       | 60                        |

**Supplementary Table 1** Primer sequences and annealing temperatures (T<sub>m</sub>) for bisulfite sequencing, methylation-specific PCR (MSP), chromatin immunoprecipitation (ChiP) and RT-PCR reactions. “y”, stands for “c” or “t”; “r”, stands for “g” or “a”.
